# Supplementary material for: Unwalkable Neighborhoods, Poverty, and the Risk of Diabetes Among Recent Immigrants to Canada Compared With Long-Term Residents
Source: PubMed Central journal article supplement — Diabetes Care. 2013 Jan 17;36(2):302–8. doi: 10.2337/dc12-0777 (PMC3554289; doi:10.2337/dc12-0777), 2013-01-17
Supplement: supp_dc12-0777v120777_DC120777SupplementaryData.pdf [file supp_dc12-0777v120777_DC120777SupplementaryData.pdf]

SUPPLEMENTARY DATA

**Supplementary Table 1.** Full model for relationship between walkability quintile and diabetes incidence among men aged 30-64 years

|                            |                          | Parameter Estimate ( $\beta$ ) | Standard Error | Pr>ChiSq | Relative Risk | 95% Confidence Intervals |       |
|----------------------------|--------------------------|--------------------------------|----------------|----------|---------------|--------------------------|-------|
|                            |                          |                                |                |          |               | Lower                    | Upper |
| <b>Recent Immigrants</b>   |                          |                                |                |          |               |                          |       |
| Age                        |                          | 0.0580                         | 0.0016         | <.0001   | 1.06          | 1.06                     | 1.06  |
| Walkability Quintile (Q)   |                          |                                |                |          |               |                          |       |
|                            | Q1 (lowest walkability)  | 0.4563                         | 0.0534         | <.0001   | 1.58          | 1.42                     | 1.75  |
|                            | Q2                       | 0.4051                         | 0.0533         | <.0001   | 1.50          | 1.35                     | 1.66  |
|                            | Q3                       | 0.3627                         | 0.0543         | <.0001   | 1.44          | 1.29                     | 1.6   |
|                            | Q4                       | 0.2017                         | 0.0569         | 0.0004   | 1.22          | 1.09                     | 1.37  |
|                            | Q5 (highest walkability) | Ref                            | Ref            | Ref      | 1.00          |                          |       |
| Income Quintile (Q)        |                          |                                |                |          |               |                          |       |
|                            | Q1 (lowest walkability)  | 0.8135                         | 0.0655         | <.0001   | 2.26          | 1.98                     | 2.56  |
|                            | Q2                       | 0.5731                         | 0.0685         | <.0001   | 1.77          | 1.55                     | 2.03  |
|                            | Q3                       | 0.4713                         | 0.0753         | <.0001   | 1.6           | 1.38                     | 1.86  |
|                            | Q4                       | 0.3791                         | 0.0806         | <.0001   | 1.46          | 1.23                     | 1.71  |
|                            | Q5 (highest walkability) | Ref                            | Ref            | Ref      | 1.00          |                          |       |
| <b>Long-term Residents</b> |                          |                                |                |          |               |                          |       |
| Age                        |                          |                                |                |          |               |                          |       |
| Walkability Quintile (Q)   |                          |                                |                |          |               |                          |       |
|                            | Q1 (lowest walkability)  | 0.2800                         | 0.0232         | <.0001   | 1.32          | 1.26                     | 1.38  |
|                            | Q2                       | 0.2387                         | 0.0236         | <.0001   | 1.27          | 1.21                     | 1.33  |
|                            | Q3                       | 0.1909                         | 0.0241         | <.0001   | 1.21          | 1.15                     | 1.27  |
|                            | Q4                       | 0.1268                         | 0.0240         | <.0001   | 1.14          | 1.08                     | 1.19  |
|                            | Q5 (highest walkability) | Ref                            | Ref            | Ref      | 1.00          |                          |       |
| Income Quintile (Q)        |                          |                                |                |          |               |                          |       |
|                            | Q1 (lowest walkability)  | 0.6667                         | 0.0245         | <.0001   | 1.95          | 1.86                     | 2.04  |
|                            | Q2                       | 0.5608                         | 0.0251         | <.0001   | 1.75          | 1.67                     | 1.84  |
|                            | Q3                       | 0.4832                         | 0.0276         | <.0001   | 1.62          | 1.54                     | 1.71  |
|                            | Q4                       | 0.3535                         | 0.0290         | <.0001   | 1.42          | 1.35                     | 1.51  |
|                            | Q5 (highest walkability) | Ref                            | Ref            | Ref      | 1.00          |                          |       |

Ref = Referent group

SUPPLEMENTARY DATA

**Supplementary Table 2.** Full model for relationship between walkability quintile and diabetes incidence among women aged 30-64 years

|                            |                          | Parameter Estimate ( $\beta$ ) | Standard Error | Pr > ChiSq | Relative Risk | 95% Confidence Intervals |       |
|----------------------------|--------------------------|--------------------------------|----------------|------------|---------------|--------------------------|-------|
|                            |                          |                                |                |            |               | Lower                    | Upper |
| <b>Recent Immigrants</b>   |                          |                                |                |            |               |                          |       |
| Age                        |                          | 0.0640                         | 0.0016         | <.0001     | 1.07          | 1.06                     | 1.07  |
| Walkability Quintile (Q)   |                          |                                |                |            |               |                          |       |
|                            | Q1 (lowest walkability)  | 0.5117                         | 0.0601         | <.0001     | 1.67          | 1.48                     | 1.88  |
|                            | Q2                       | 0.4185                         | 0.0604         | <.0001     | 1.52          | 1.35                     | 1.71  |
|                            | Q3                       | 0.3767                         | 0.0615         | <.0001     | 1.46          | 1.29                     | 1.64  |
|                            | Q4                       | 0.2828                         | 0.0637         | <.0001     | 1.33          | 1.17                     | 1.50  |
|                            | Q5 (highest walkability) | Ref                            | Ref            | Ref        | 1.00          |                          |       |
| Income Quintile (Q)        |                          |                                |                |            |               |                          |       |
|                            | Q1 (lowest walkability)  | 0.9829                         | 0.0747         | <.0001     | 2.67          | 2.31                     | 3.09  |
|                            | Q2                       | 0.7600                         | 0.0779         | <.0001     | 2.14          | 1.84                     | 2.50  |
|                            | Q3                       | 0.6187                         | 0.0853         | <.0001     | 1.86          | 1.57                     | 2.19  |
|                            | Q4                       | 0.3072                         | 0.0945         | 0.001      | 1.36          | 1.13                     | 1.64  |
|                            | Q5 (highest walkability) | Ref                            | Ref            | Ref        | 1.00          |                          |       |
| <b>Long-term Residents</b> |                          |                                |                |            |               |                          |       |
| Age                        |                          | 0.0606                         | 0.0007         | <.0001     | 1.06          | 1.06                     | 1.06  |
| Walkability Quintile (Q)   |                          |                                |                |            |               |                          |       |
|                            | Q1 (lowest walkability)  | 0.2174                         | 0.0252         | <.0001     | 1.24          | 1.18                     | 1.31  |
|                            | Q2                       | 0.2186                         | 0.0254         | <.0001     | 1.24          | 1.18                     | 1.31  |
|                            | Q3                       | 0.1935                         | 0.0258         | <.0001     | 1.21          | 1.15                     | 1.28  |
|                            | Q4                       | 0.0863                         | 0.0262         | 0.001      | 1.09          | 1.04                     | 1.15  |
|                            | Q5 (highest walkability) | Ref                            | Ref            | Ref        | 1.00          |                          |       |
| Income Quintile (Q)        |                          |                                |                |            |               |                          |       |
|                            | Q1 (lowest walkability)  | 0.8435                         | 0.0267         | <.0001     | 2.32          | 2.21                     | 2.45  |
|                            | Q2                       | 0.7648                         | 0.0272         | <.0001     | 2.15          | 2.04                     | 2.27  |
|                            | Q3                       | 0.6110                         | 0.0301         | <.0001     | 1.84          | 1.74                     | 1.95  |
|                            | Q4                       | 0.3864                         | 0.0320         | <.0001     | 1.47          | 1.38                     | 1.57  |
|                            | Q5 (highest walkability) | Ref                            | Ref            | Ref        | 1.00          |                          |       |

Ref = Referent group
